# Supplementary material
Source: PubMed Central journal article supplement (PMC4930083)

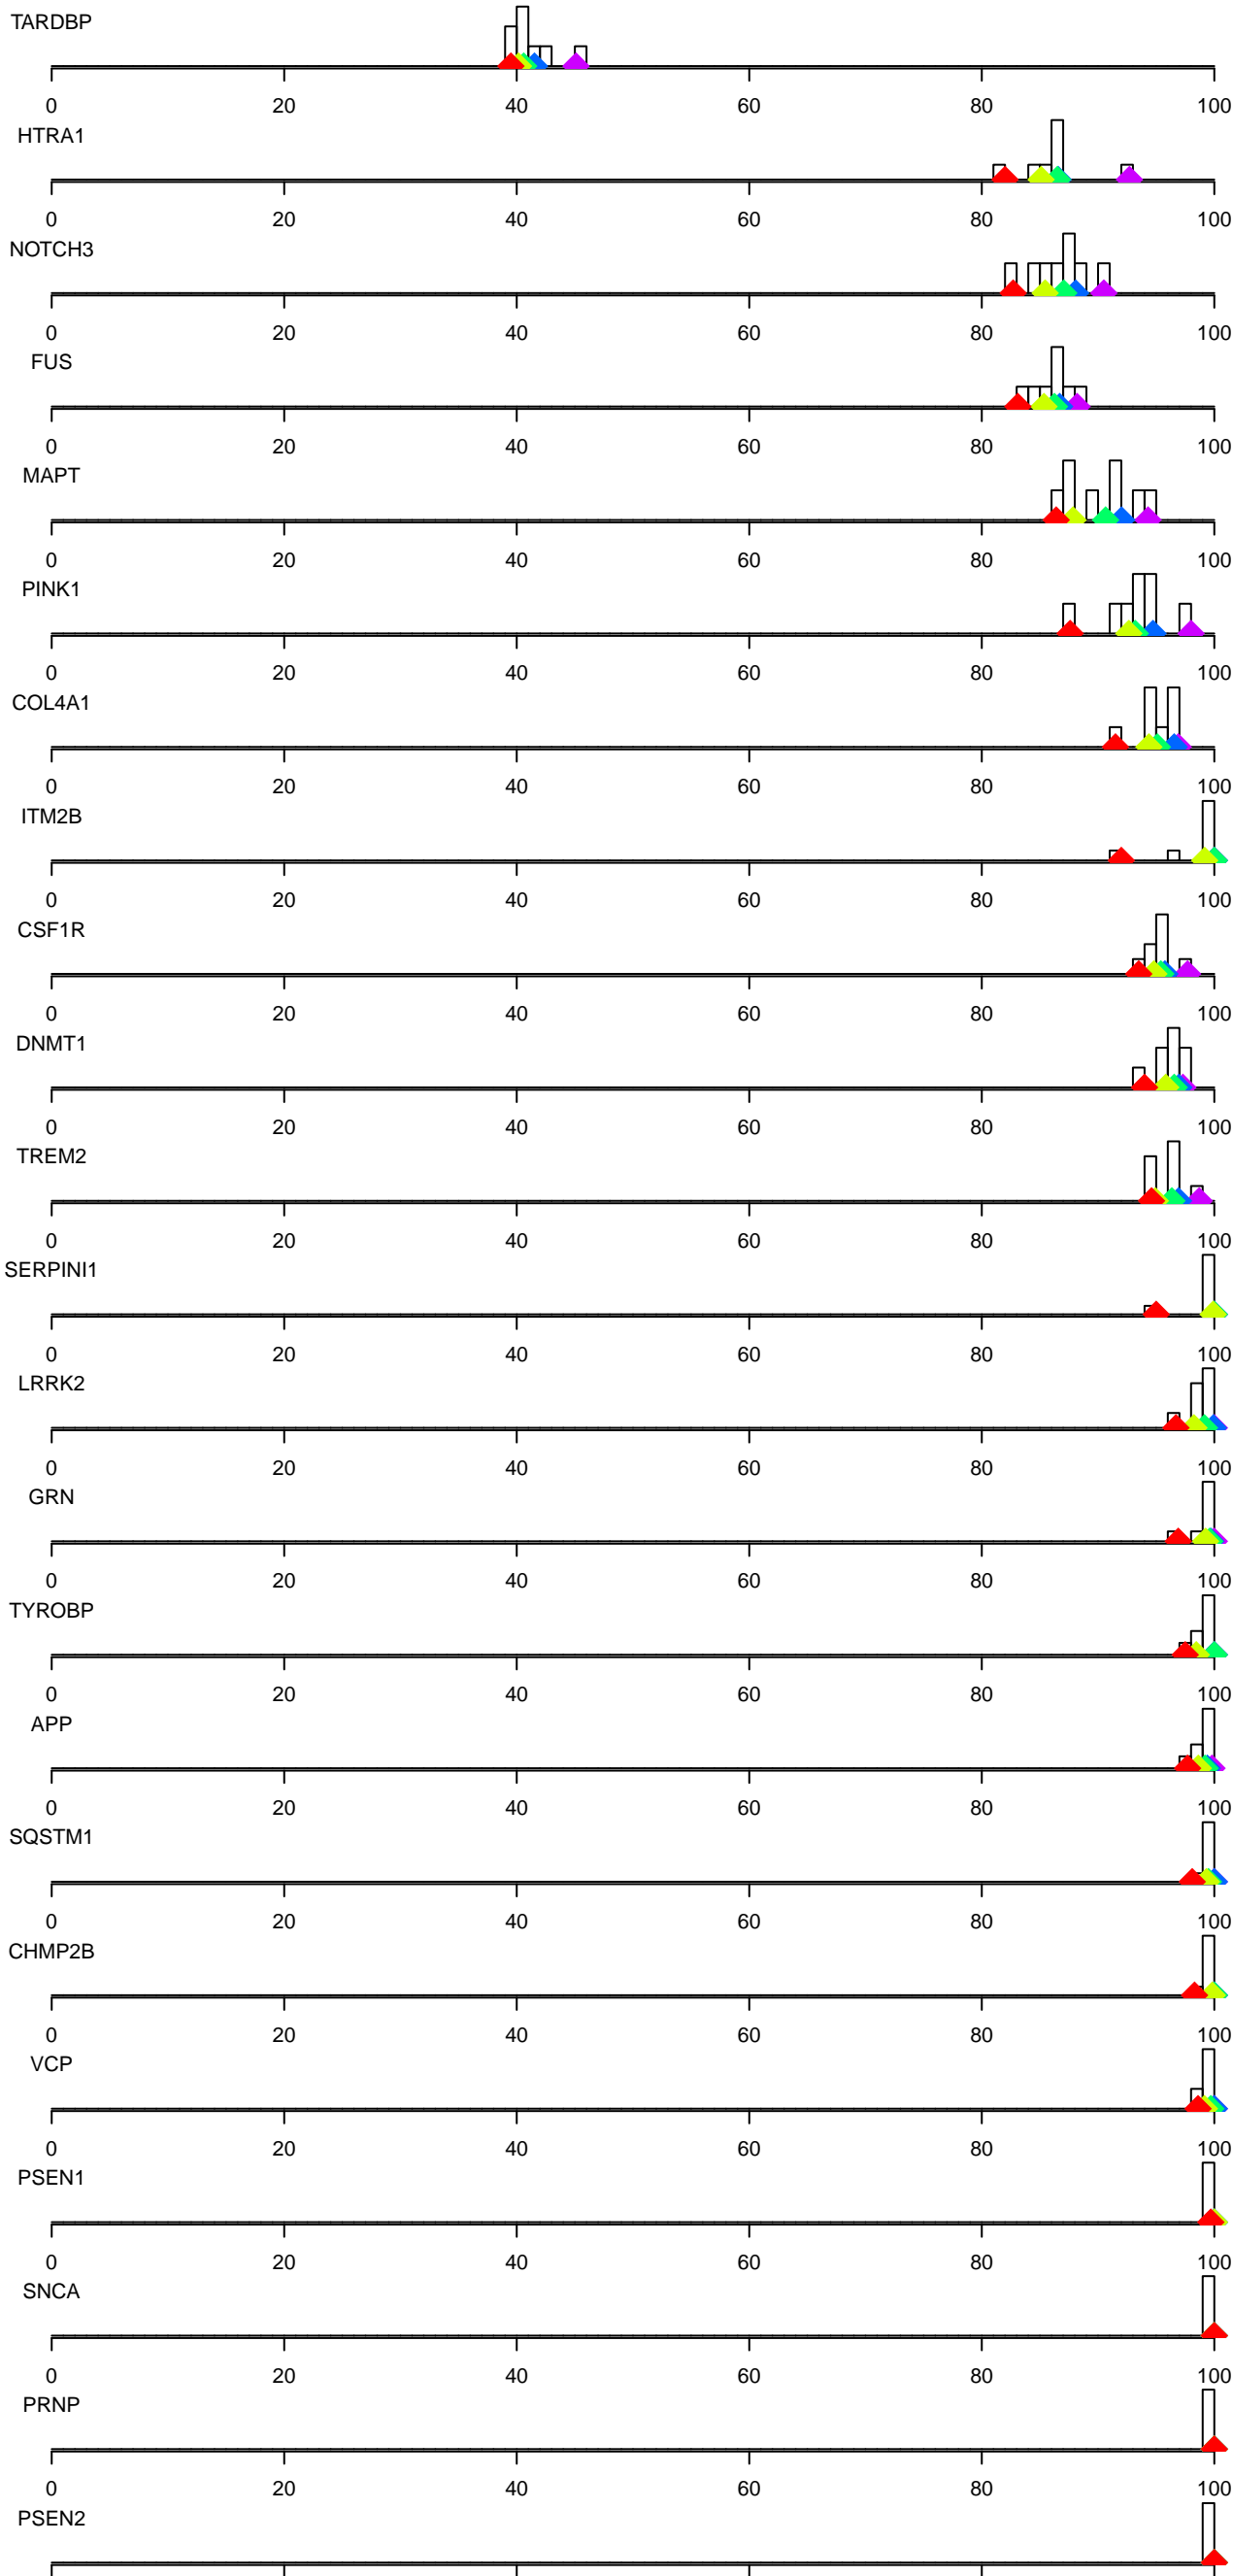

Supplement: ejhg2015173x2.pdf [file ejhg2015173x2.pdf]

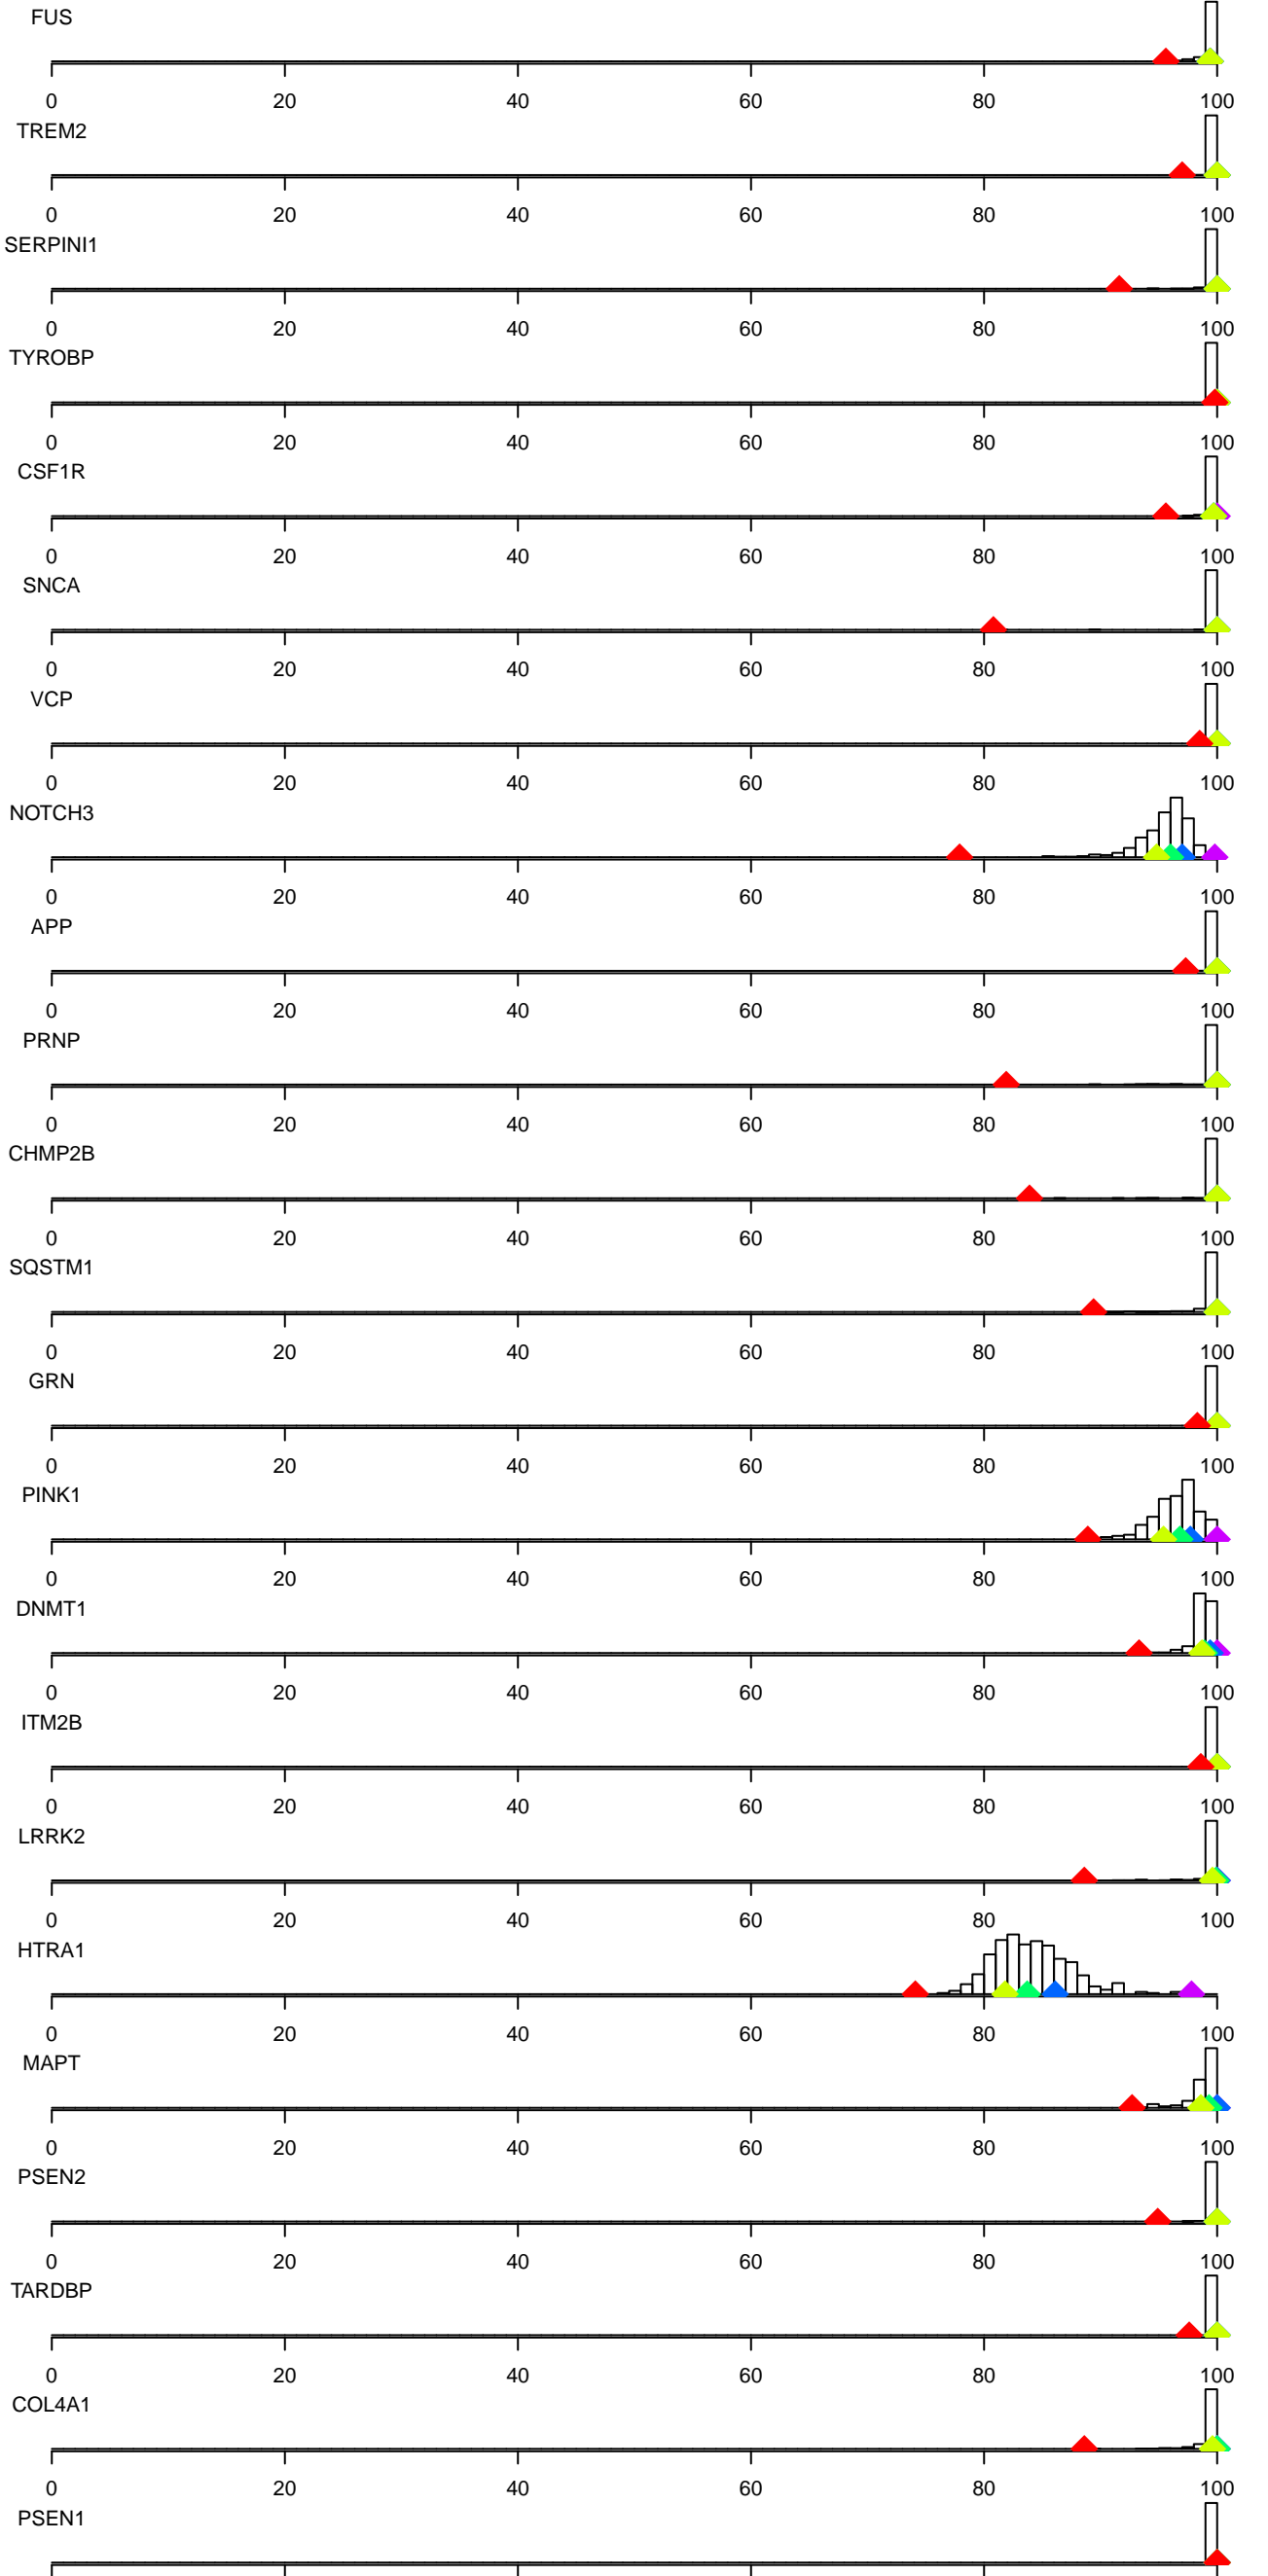

Supplement: ejhg2015173x3.pdf [file ejhg2015173x3.pdf]

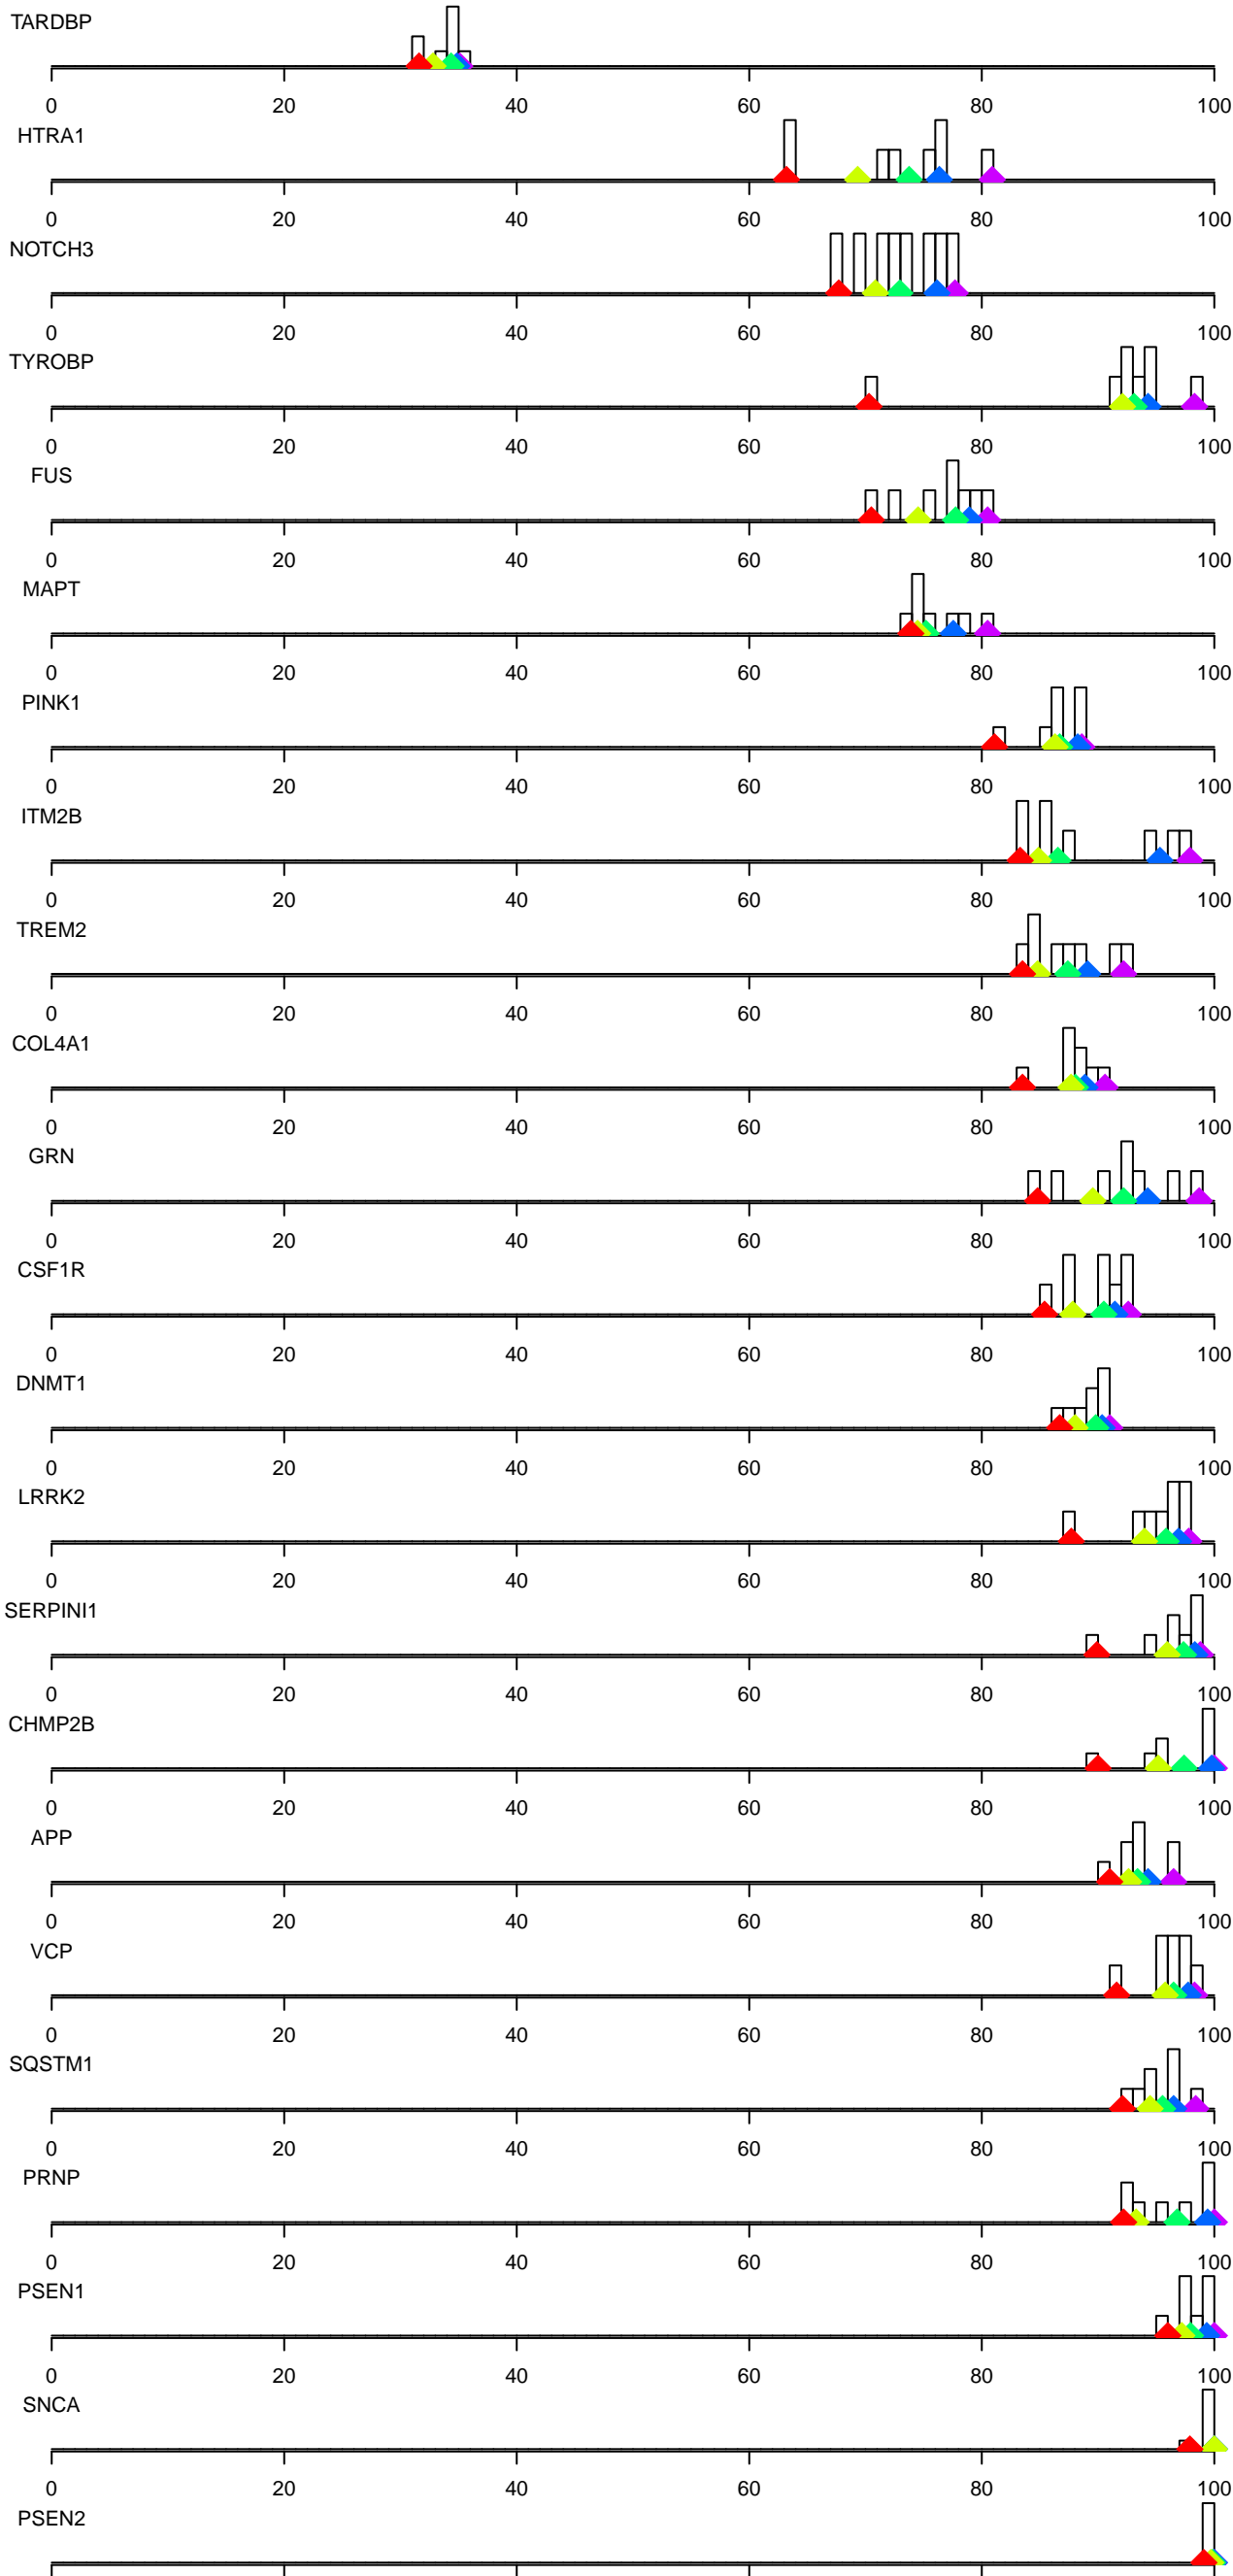

Supplement: ejhg2015173x4.pdf [file ejhg2015173x4.pdf]

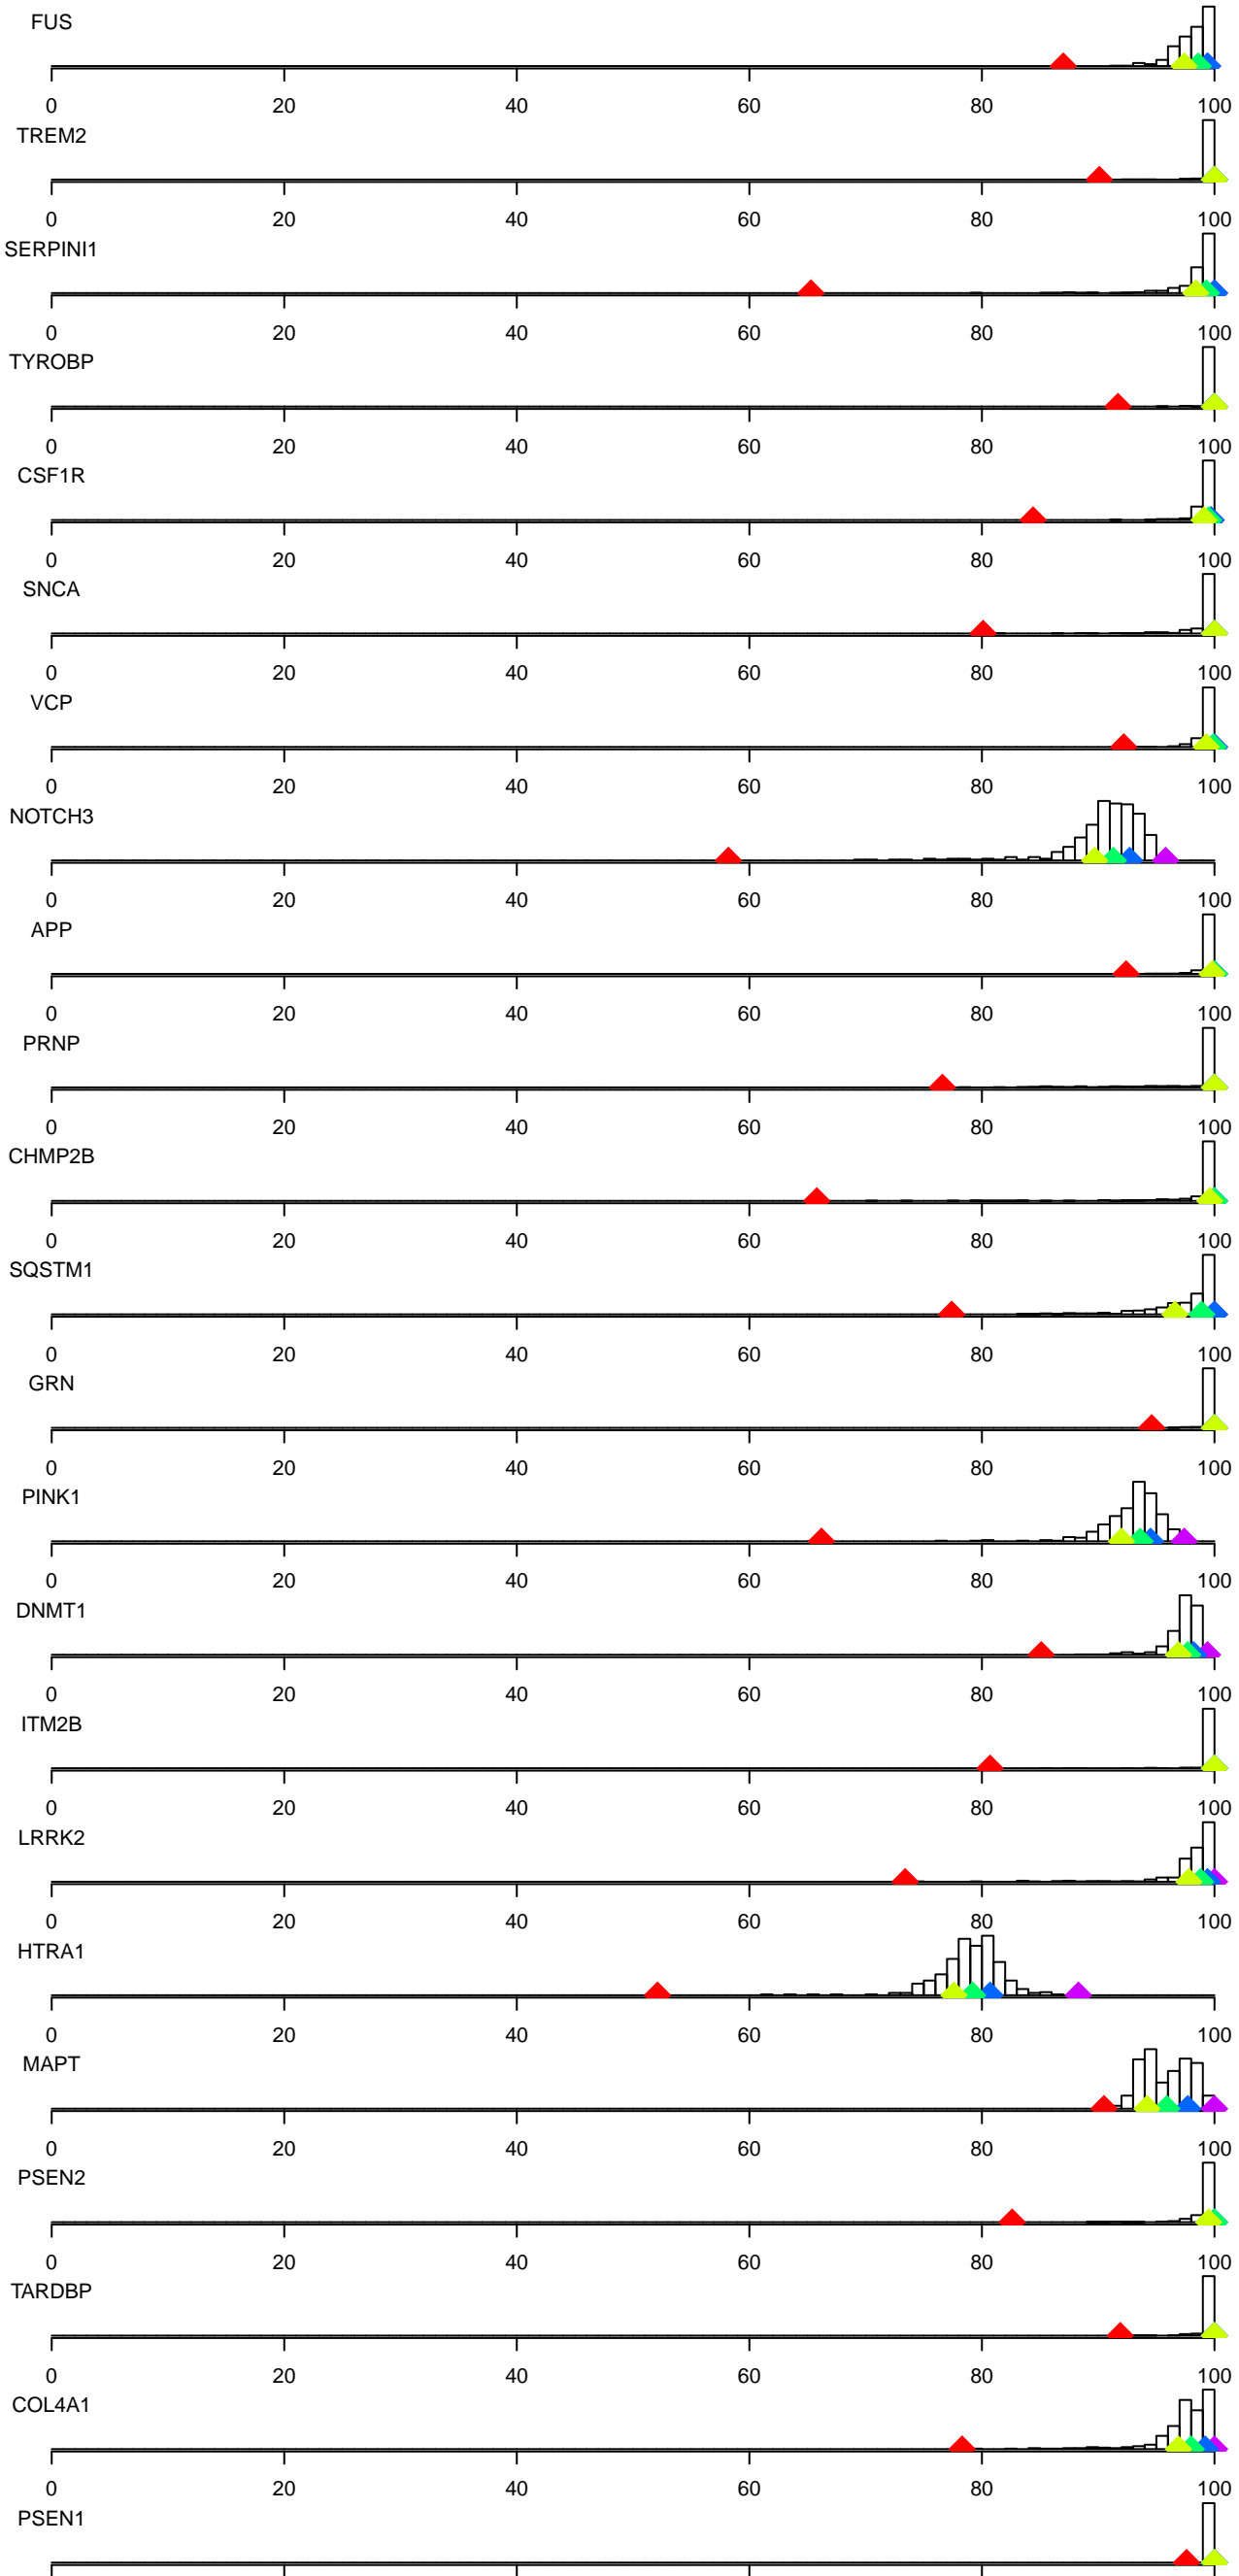

Supplement: ejhg2015173x5.pdf [file ejhg2015173x5.pdf]
